# Supplementary material for: Nomograms predicting Overall Survival and Cancer-specific Survival for Synchronous Colorectal Liver-limited Metastasis
Source: PubMed Central journal article supplement (PMC7532510; doi:10.7150/jca.46155), 2020-08-27

**Supplementary Fig.1** the survival curves compared the difference among non-colectomy, standard and simplified colectomy in patients without hepatic surgery definitely. A: The median OS were 24-month, 19-month and 14-month for standard colectomy, simplified colectomy and non-colectomy respectively. B: The median CSS were 26-month, 21-month and 16-month for standard colectomy, simplified colectomy and non-colectomy respectively.

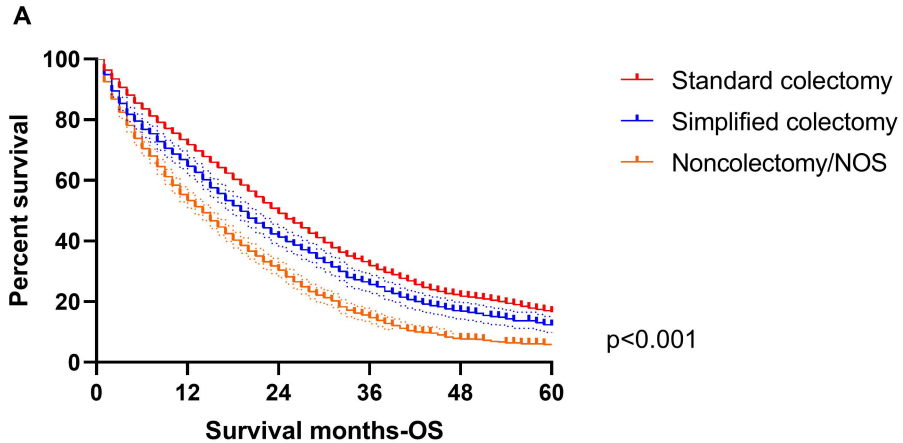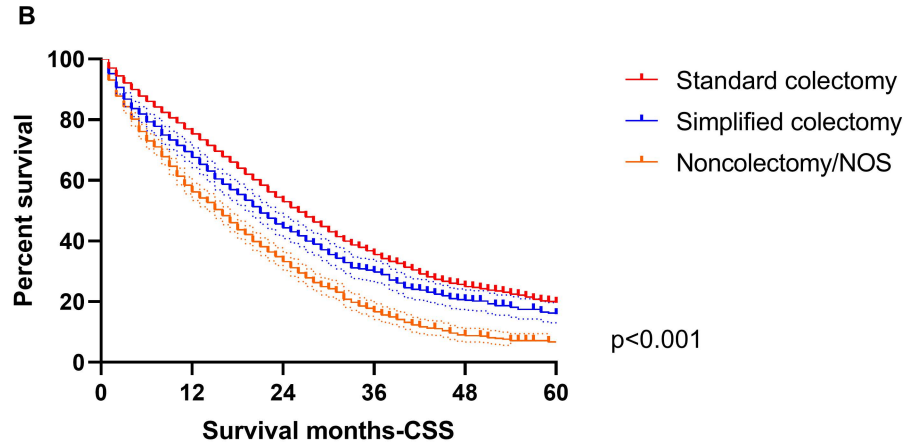

Supplement: jcav11p6213s1.pdf [file jcav11p6213s1.pdf]
